## CMR analysis of the cardioprotective effects of chronic statin therapy prior to first STEMI: a propensity score analysis

G. Mendieta Badimon<sup>1</sup>, M. Calvo<sup>2</sup>, J. Guzman<sup>2</sup>, P. Perez<sup>2</sup>, M. Alamar<sup>3</sup>, G. Vilahur<sup>4</sup>, J. Gavara<sup>5</sup>, S. Vargas<sup>2</sup>, P. Rello<sup>6</sup>, F. Valente<sup>6</sup>, J. Rios<sup>7</sup>, L. Badimon<sup>4</sup>, J.F. Rodriguez-Palmares<sup>6</sup>, V. Bodi<sup>5</sup>, J.T. Ortiz-Perez<sup>3</sup>

<sup>1</sup>National Centre for Cardiovascular Research (CNIC), Madrid, Spain; <sup>2</sup>Hospital Clinic de Barcelona, Cardiovascular Institute, Barcelona, Spain; <sup>3</sup>Hospital Clinic de Barcelona, Institut Clínic Cardiovascular, IDIBAPS, Universitat de Barcelona, Barcelona, Spain; <sup>4</sup>Catalan Institute for Cardiovascular Science, IR-Hospital de la Santa Creu i Sant Pau, CIBER-CV, Barcelona, Spain; <sup>5</sup>Instituto de Investigacion Sanitaria INCLIVA, Valencia, Spain; <sup>6</sup>University Hospital Vall d'Hebron, Cardiology, Barcelona, Spain; <sup>7</sup>Hospital Clinic de Barcelona, Medical Statistics Core Facility, IDIBAPS, Barcelona, Spain

**Funding Acknowledgement:** Type of funding sources: Other. Main funding source(s): This study was partially funded by several grants from Fundació La Marató TV3 (2015 30 31 32), Instituto de Salud Carlos III (FIS15/00531) and La Caixa Banking Foundation (HR17-00527).

**Background:** In addition to their lipid-lowering properties, statins possess cardioprotective effects. However, the impact of the latter on acute cardioprotection and adverse left ventricular (LV) remodelling following ST-elevation myocardial infarction (STEMI) have not been investigated through cardiac magnetic resonance (CMR) analysis to date.

**Purpose:** To investigate the cardioprotective effects of chronic oral statin treatment prior to first STEMI.

**Methods:** The study included 1236 patients with a first STEMI and a CMR performed during the index admission. Among them, 923 underwent a second CMR at 6 months follow-up. The effects of chronic oral statin treatment prior to STEMI on acute infarct size (IS) as a percentage of LV mass, LV ejection fraction (LVEF), microvascular obstruction (MVO), and changes in LV end-diastolic volume (EDVi) and end-systolic volume indexes (ESVi)] at 6 months were evaluated. A propensity score to receive treatment prior to STEMI with statins was calculated based on the inverse probability of treatment weighting (IPTW) from the following parameters: age on admission, sex, smoking status, type 2 diabetes, hypertension, family history of coronary artery disease, current co-treatments (ACEis/ARBs and/or beta-blockers), heart rate (HR), blood pressure (BP) and creatinine levels on admission, and pre-PCI TIMI flow in the culprit artery. Results were stratified according to a symptom-to-balloon time (S2Bt) ≤ or >3 hours.

**Results:** The study population's median age was 59 years (IQR 50–68), 16.3% were women; 18.9% were receiving treatment with statins prior to STEMI (table 1). Despite no effect on MVO occurrence (OR: 0.81 [0.60; 1.09], p=0.166), prior treatment with statins was associated with a reduction in IS (18.43% [16.67; 20.19] vs 21.50% [20.67; 22.34], p=0.002), particularly among subjects with ≤3 hours of S2Bt. Accordingly, prior treatment with statins conferred a benefit in mean baseline LVEF (50.23% [48.73; 51.73] vs 48.15% [47.43; 48.87], p=0.014). At 6 months, treatment with statins prior to STEMI blunted the changes in EDVi and ESVi, but only among patients with ≤3 hours of S2Bt (table 2). In addition, a reduction in the probability of adverse LV remodelling, defined as an increase in ESVi >10%, was observed in statin pre-treated patients (OR: 0.67 [0.45; 0.99], p=0.043).

**Conclusion:** Treatment with statins before STEMI is associated with improved indexes of cardioprotection as assessed by CMR, particularly among subjects with S2Bt ≤3 hours. Those effects seem to have an impact in limiting adverse LV remodelling as early as 6 months follow-up, and a greater than 10% change in ESVi. These findings warrant further and prospective evaluation of the potential cardioprotective effects of chronic oral statin treatment prior to STEMI.

**Table 1. Baseline population characteristics for patients with 2 CMR studies and sorted by statin use prior to first STEMI**

|                                                   | All participants<br>N=923 | Statin nonusers<br>N=749 | Statin users<br>N=174 | Standardized difference |               |        |
|---------------------------------------------------|---------------------------|--------------------------|-----------------------|-------------------------|---------------|--------|
|                                                   |                           |                          |                       | Raw                     | IPTW          |        |
| <b>Demographic parameters</b>                     |                           |                          |                       |                         |               |        |
| Age, years                                        | 59 (50 - 68)              | 58 (49 - 67)             | 64 (55 - 70)          | 0.4540                  | 0.0255        |        |
| Female sex                                        | 150 (16.3)                | 105 (14.0)               | 45 (25.9)             | -0.300                  | 0.0037        |        |
| <b>Cardiovascular risk factors</b>                |                           |                          |                       |                         |               |        |
| Smoking status                                    | Active/Ex                 | 584 (63.3)               | 495 (66.1)            | 89 (51.2)               | -0.307 0.0105 |        |
|                                                   | Never                     | 339 (36.7)               | 254 (33.9)            | 85 (48.9)               |               |        |
| Diabetes type 2                                   | 166 (18.0)                | 110 (14.7)               | 56 (32.2)             | 0.4222                  | -0.667        |        |
| Hypertension                                      | 425 (46.1)                | 310 (41.4)               | 115 (66.1)            | 0.5114                  | 0.0050        |        |
| FH of CAD                                         | 133 (14.4)                | 98 (13.1)                | 35 (20.1)             | 0.1898                  | -0.005        |        |
| <b>Parameters measured on admission for STEMI</b> |                           |                          |                       |                         |               |        |
| Symptom-to-balloon time, minutes                  | 190 (135 - 300)           | 190 (130 - 268)          | 190 (135 - 300)       | -0.032                  | -0.172        |        |
| Heart rate, bpm                                   | ≤ 60                      | 149 (16.1)               | 121 (16.2)            | 28 (16.1)               | 0.0239        | 0.1275 |
|                                                   | 61 - 100                  | 712 (77.1)               | 579 (77.3)            | 133 (76.4)              |               |        |
|                                                   | > 100                     | 62 (6.7)                 | 49 (6.5)              | 13 (7.5)                |               |        |
| Blood pressure, mmHg                              | ≤ 140                     | 624 (67.6)               | 521 (69.6)            | 103 (59.2)              | 0.2177        | 0.0222 |
|                                                   | > 140                     | 299 (32.4)               | 228 (30.4)            | 71 (40.8)               |               |        |
| Mean creatinine (SD), mg/dL                       | 0.94 (0.33)               | 0.94 (0.32)              | 0.95 (0.39)           | 0.0499                  | -0.028        |        |
| Pre-PCI TIMI flow                                 | 0                         | 623 (67.5)               | 498 (66.5)            | 125 (71.8)              | -0.170        | 0.0232 |
|                                                   | 1                         | 55 (6.0)                 | 40 (5.3)              | 15 (8.6)                |               |        |
|                                                   | 2                         | 95 (10.3)                | 76 (10.2)             | 19 (10.9)               |               |        |
|                                                   | 3                         | 150 (16.3)               | 135 (18.2)            | 15 (8.6)                |               |        |
| <b>Active co-treatments prior to STEMI</b>        |                           |                          |                       |                         |               |        |
| ACE-inhibitors/ARBs                               | 207 (22.4)                | 136 (18.2)               | 71 (40.8)             | 0.5128                  | 0.0252        |        |
| Beta-blockers                                     | 56 (6.1)                  | 28 (3.7)                 | 28 (16.1)             | 0.4225                  | 0.0076        |        |

Data are numbers (%) or medians (p25-p75) unless stated otherwise.

Abbreviations: ACE, angiotensin converting enzyme; ARBs, angiotensin receptor blockers; CAD: coronary artery disease; FH: family history; IPTW: inverse probability of treatment weighting; PCI: percutaneous coronary intervention; STEMI: ST-elevation myocardial infarction; TIMI: thrombolysis in myocardial infarction.

**Table 2. IPTW analysis of variance for CMR analyses outcomes at 6 months post-MI (N=923)**

|                                              |                 | S2Bt ≤ 3 h |                |         | S2Bt > 3 h |                |         |
|----------------------------------------------|-----------------|------------|----------------|---------|------------|----------------|---------|
|                                              |                 | LS Mean    | 95% CI         | p-value | LS Mean    | 95% CI         | p-value |
| <b>CMR analyses of acute post-MI effects</b> |                 |            |                |         |            |                |         |
| IS, %                                        | Statin users    | 17.68      | 15.24, 20.11   | 0.024   | 19.69      | 17.19, 22.20   | 0.072   |
|                                              | Statin nonusers | 20.81      | 19.59, 22.03   |         | 22.22      | 21.07, 23.37   |         |
| MVO score                                    | Statin users    | 502.20     | 450.54, 553.86 | 0.430   | 540.32     | 485.67, 594.97 | 0.401   |
|                                              | Statin nonusers | 525.46     | 499.42, 551.51 |         | 566.29     | 540.03, 592.55 |         |
| LVEF, %                                      | Statin users    | 49.62      | 47.61, 51.64   | 0.412   | 50.58      | 48.38, 52.78   | 0.015   |
|                                              | Statin nonusers | 48.68      | 47.66, 49.69   |         | 47.56      | 46.53, 48.59   |         |
| <b>CMR analyses at 6 months post-MI</b>      |                 |            |                |         |            |                |         |
| EDVi, mL/m2                                  | Statin users    | -0.02      | -0.07, 0.03    | 0.040   | 0.08       | 0.03, 0.13     | 0.285   |
|                                              | Statin nonusers | 0.04       | 0.01, 0.06     |         | 0.05       | 0.03, 0.07     |         |
| ESVi, mL/m2                                  | Statin users    | -0.08      | -0.15, -0.01   | 0.053   | 0.03       | -0.04, 0.10    | 0.652   |
|                                              | Statin nonusers | 0.00       | -0.04, 0.03    |         | 0.01       | -0.02, 0.04    |         |

Abbreviations: CMR: cardiac magnetic resonance; EDVi: end-diastolic volume index; ESVi: end-systolic volume index; IPTW: inverse probability of treatment weighting; IS: infarct size; LS Mean: least squares mean; LVEF: left ventricular ejection fraction; MI: myocardial infarction; S2Bt: symptom-to-balloon time.
